# Supplementary material for: Examining Smartphone-assessed Executive Function Metrics and Intrinsic Resting-State Functional Connectivity in Depression
Source: Research Square preprint supplement (doi:10.21203/rs.3.rs-8297301/v1), 2025-12-19
Supplement: Supplementary file 2 [file 1b5947346c1dd854b023b2ca.pdf]

**Table 1.** Demographics and Participant Characteristics

| Total (N=73)                   |                                                             | HC (n=43)  | cMDD (n=30) |                               |
|--------------------------------|-------------------------------------------------------------|------------|-------------|-------------------------------|
|                                |                                                             | n (%)      | n (%)       | t-test/chi-square             |
| <b>Sex</b>                     | % Female                                                    | 29 (67.4%) | 24 (80.0%)  | $\chi^2(1) = 1.40, p = .237$  |
| <b>Gender</b>                  | Female                                                      | 28 (65.1%) | 21 (70.0%)  | $\chi^2(2) = 2.23, p = .328$  |
|                                | Male                                                        | 14 (32.6%) | 6 (20.0%)   | -                             |
|                                | Something else (gender-fluid, non-binary, two-spirit, etc.) | 1 (2.3%)   | 3 (10.0%)   | -                             |
| <b>Age (Years)</b>             | M (SD)                                                      | 27.0 (8.9) | 27.7 (8.7)  | $t(71) = -0.35, p = .730$     |
|                                | Range (years)                                               | 18-52      | 19-57       | -                             |
| <b>Education</b>               | Some college or associate degree                            | 17 (39.5%) | 11 (36.7%)  | $\chi^2(2) = 0.34, p = .844$  |
|                                | Bachelor's degree                                           | 13 (30.2%) | 8 (26.7%)   | -                             |
|                                | Graduate or professional training                           | 13 (30.2%) | 11 (36.7%)  | -                             |
| <b>Ethnicity</b>               | Hispanic/Latine                                             | 9 (20.9%)  | 7 (23.3%)   | $\chi^2(1) = 0.06, p = .807$  |
| <b>Race</b>                    | White                                                       | 22 (51.2%) | 16 (53.3%)  | $\chi^2(1) = 0.03, p = .855$  |
|                                | Non-White                                                   | 21 (48.8%) | 14 (46.7%)  | -                             |
|                                | Asian                                                       | 9 (20.9)   | 5 (16.1%)   | -                             |
|                                | Black or African American                                   | 4 (9.3%)   | 5 (16.1%)   | -                             |
|                                | More than one race/unknown                                  | 8 (18.6%)  | 4 (12.9%)   | -                             |
| <b>Medication</b>              | SSRI                                                        | 2 (4.7%)   | 4 (13.3%)   | $\chi^2(4) = 9.64, p = .047$  |
|                                | SNRI                                                        | 0 (0%)     | 2 (6.7%)    | -                             |
|                                | NDRI                                                        | 0 (0%)     | 4 (13.3%)   | -                             |
|                                | Benzodiazepine                                              | 0 (0%)     | 2 (6.7%)    | -                             |
|                                | Other psychotropic                                          | 0 (0%)     | 1 (3.3%)    | -                             |
| <b>Number of Medications</b>   | 0                                                           | 41 (95.3%) | 20 (66.7%)  | $\chi^2(2) = 12.27, p = .002$ |
|                                | 1                                                           | 2 (4.7%)   | 7 (23.3%)   | -                             |
|                                | 2                                                           | 0 (0%)     | 3 (10.0%)   | -                             |
| <b>IDAS-II Subscale Scores</b> | M (SD)                                                      |            |             | -                             |
|                                | Well-being                                                  | 25.5 (6.8) | 17.3 (6.2)  | $t(71) = 5.28, p < .001$      |
|                                | General depression                                          | 31 (8.1)   | 61.8 (10.7) | $t(69) = -13.72, p < .001$    |

*Note.* Values reflect original IDAS-II Well-being scores. For analyses, anhedonia was reverse-coded (Well-being multiplied by -1) and standardized (z-scored).

**Table 2.** Trail-Making Task (TMT) Accuracy: Healthy Control and cMDD Resting-State MRI Results

| <b>Effect</b>      | <b>Network</b> | <b>ROI 1</b> | <b>ROI 2</b> | <b>T Statistic (df)</b> | <b>p-unc</b> |
|--------------------|----------------|--------------|--------------|-------------------------|--------------|
| TMT Accuracy: HC   | DAN            | R IPS        | L IPS        | 2.52 (40)               | 0.016        |
|                    | SN             | ACC          | R RPFC       | 2.03 (40)               | 0.049        |
| TMT Accuracy: cMDD | DAN-SN         | R FEF        | R SMG        | 3.20 (28)               | 0.003        |
|                    | DAN            | R IPS        | R FEF        | 2.44 (28)               | 0.021        |
|                    | DAN            | L IPS        | R FEF        | 2.40 (28)               | 0.023        |
|                    | SN-FPN         | ACC          | R LPFC       | 2.12 (28)               | 0.043        |
